# Supplementary material
Source: Springer Nature journal article supplement (https://www.springermedizin.de/resource/supplementary/12899_2009_151_MOESM4_ESM.pdf/9514590)

**A**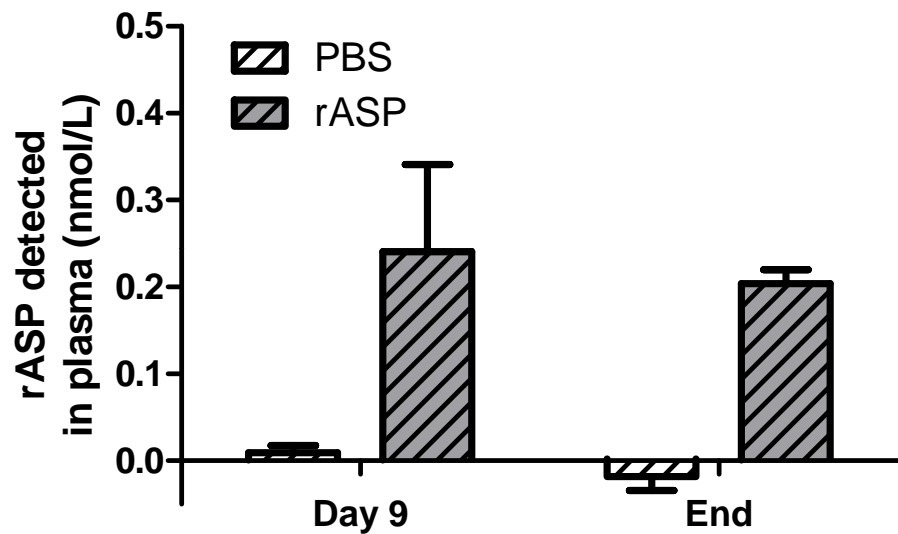**B**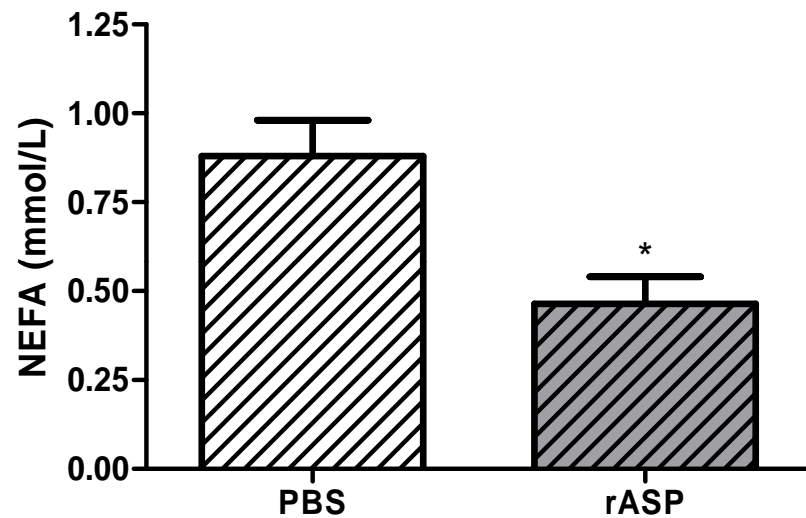**C**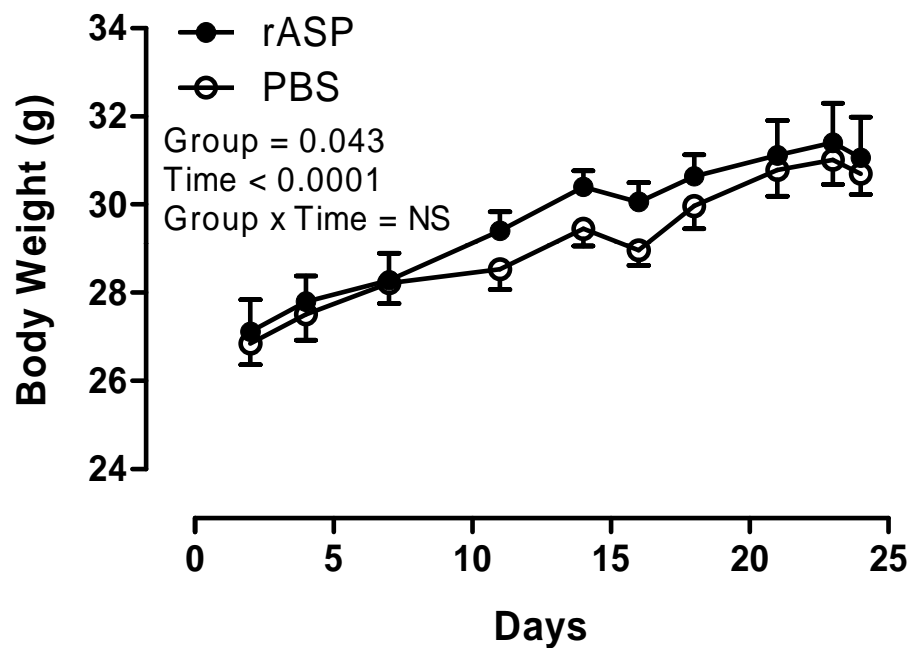**D**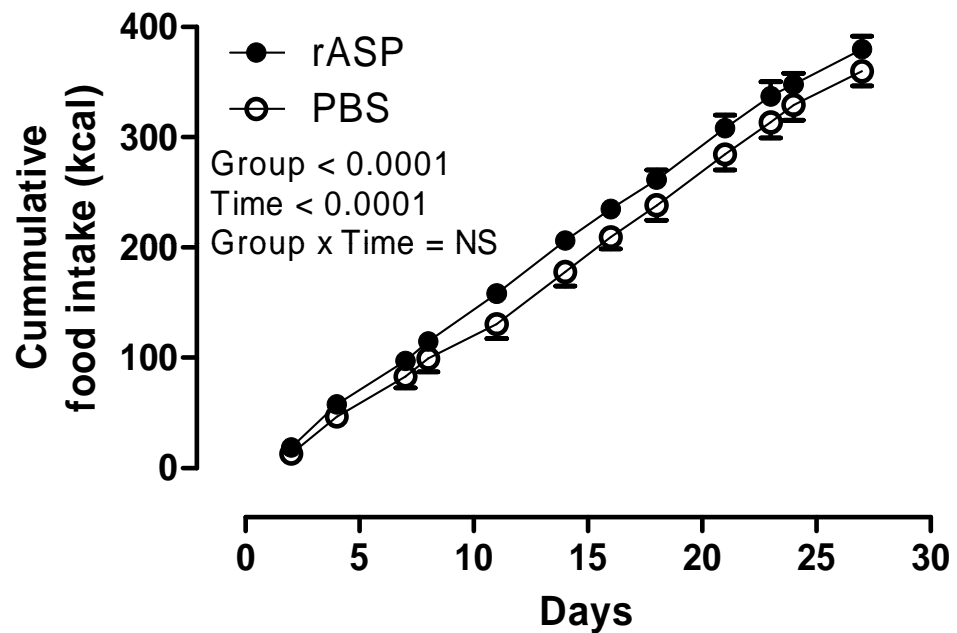

Supplement: MOESM4 [file 9514590]
